# Supplementary material
Source: PubMed Central journal article supplement (PMC7758677)
Supplement: NIHMS1655317-supplement-append.pdf [file NIHMS1655317-supplement-append.pdf]

## Appendix A

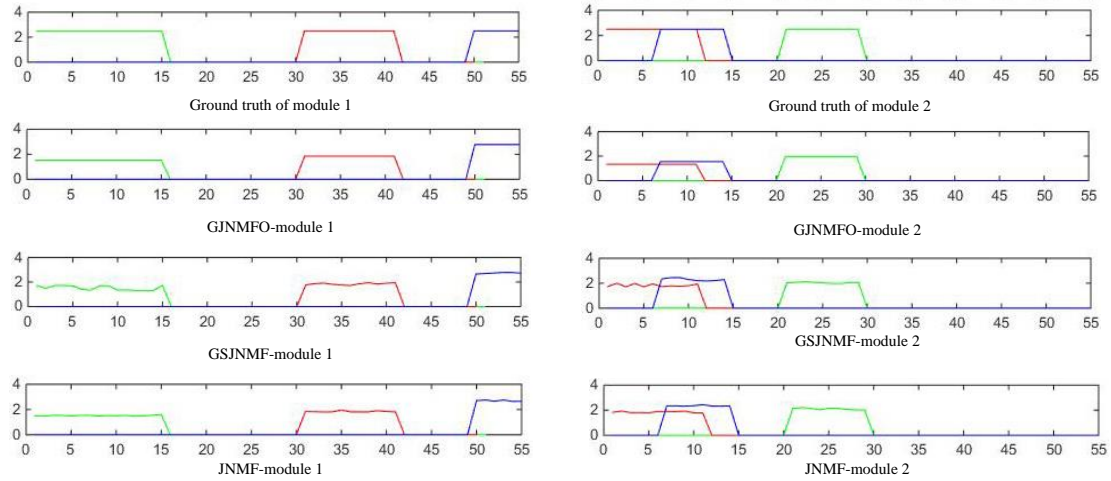

(a) the noise level  $\ell=0.5$

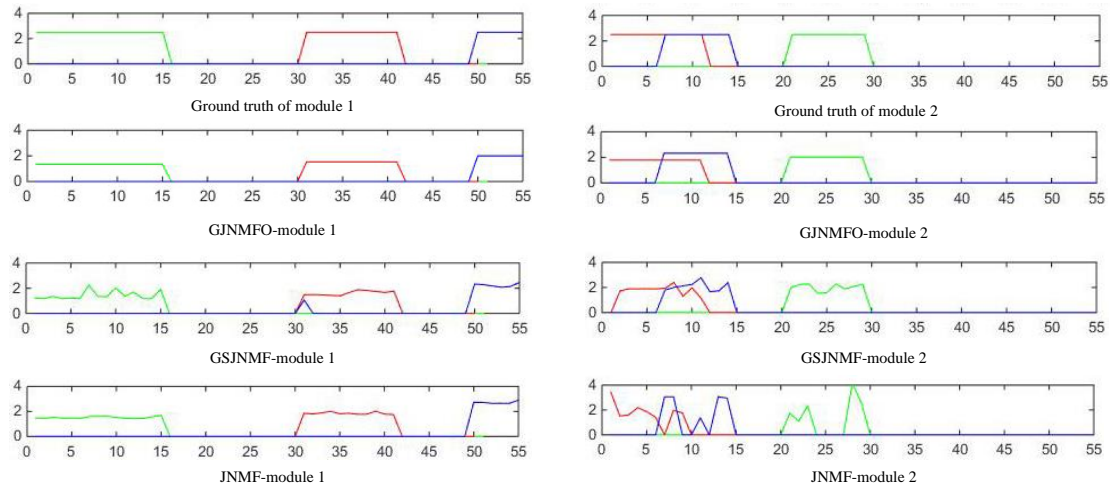

(b) the noise level  $\ell=1$

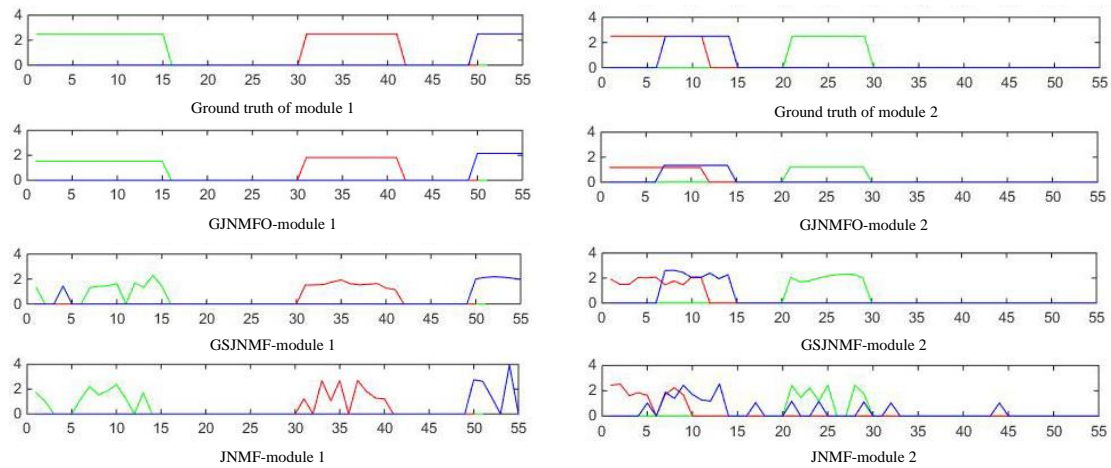

(c) the noise level  $\ell=1.5$

Fig. 1 Z-score of features obtained by GJNMF, GSJNMF and JNMF three algorithms in case2. (a), (b), and (c) are z-score of features obtained by three algorithms at a noise level of 0.5, 1, and 1.5, respectively. Ground truth represents the real z-score of the features.

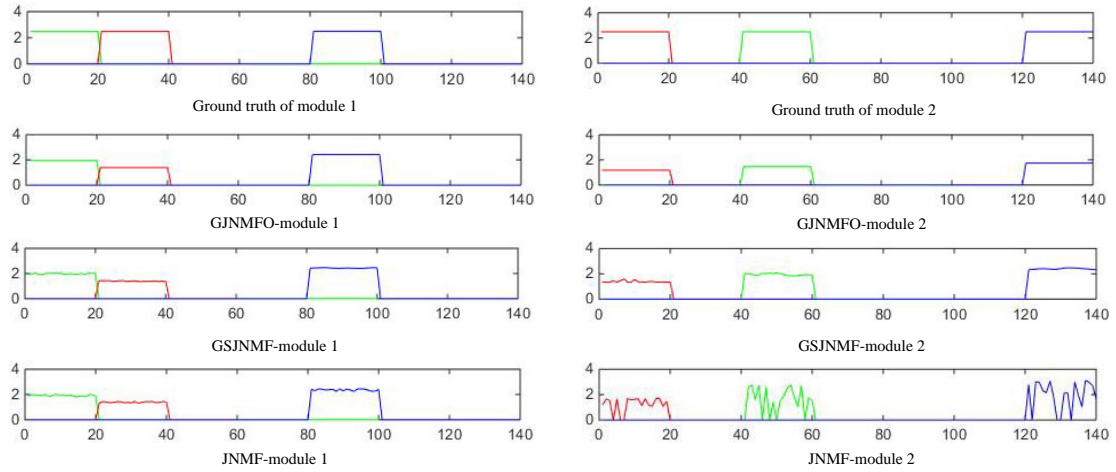

(a) the noise level  $\ell=0.5$

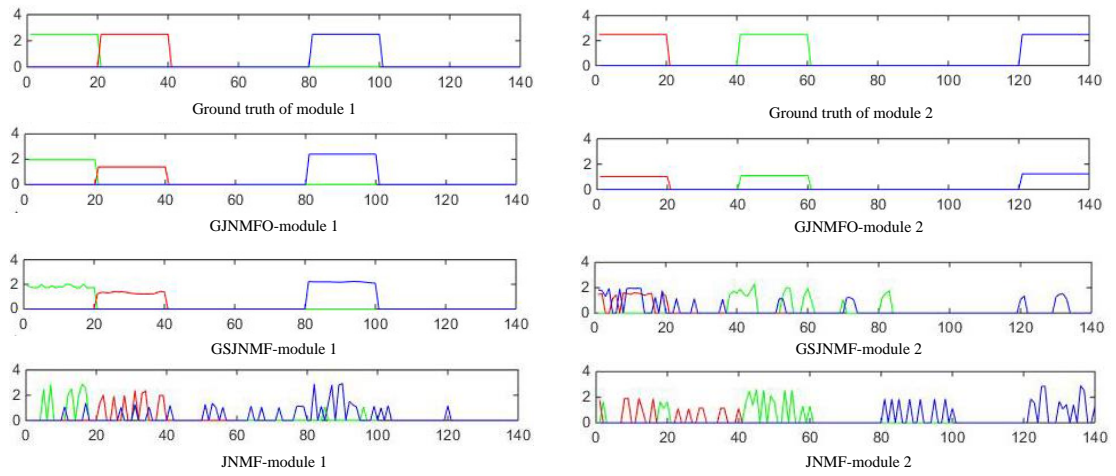

(b) the noise level  $\ell=1$

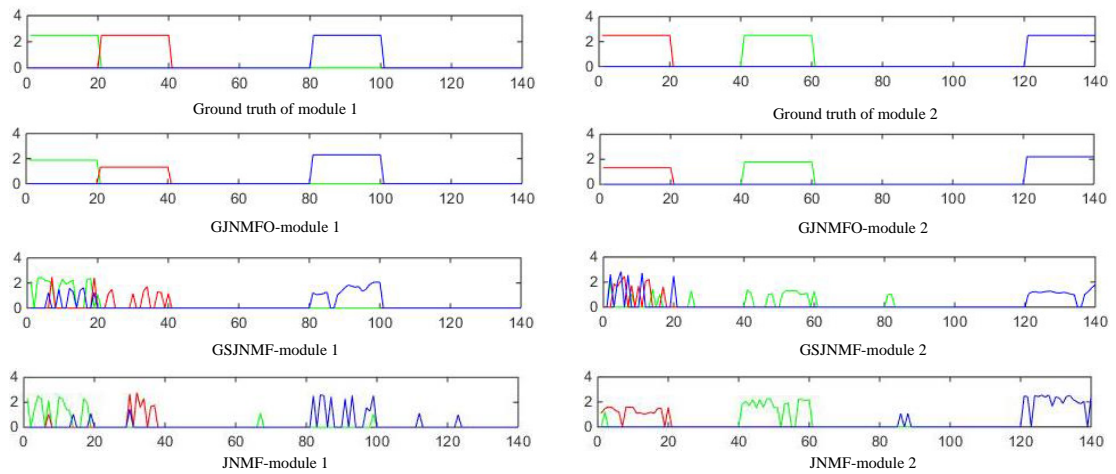

(c) the noise level  $\ell=1.5$

Fig. 2 Z-score of features obtained by GJNMF, GSJNMF and JNMF three algorithms in case3. (a), (b), and (c) are z-score of features obtained by three algorithms at a noise level of 0.5, 1, and 1.5, respectively. Ground truth represents the real z-score of the features.

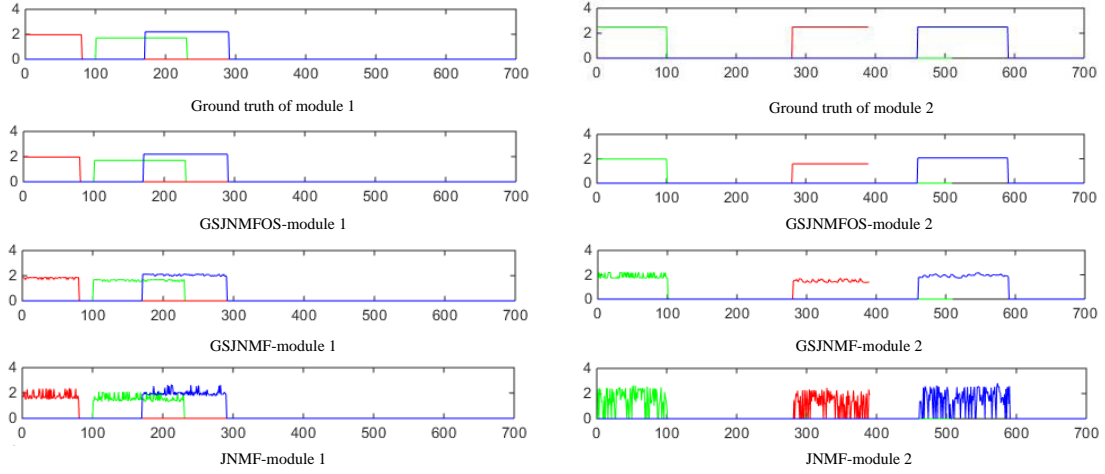

(a) the noise level  $\ell=0.5$

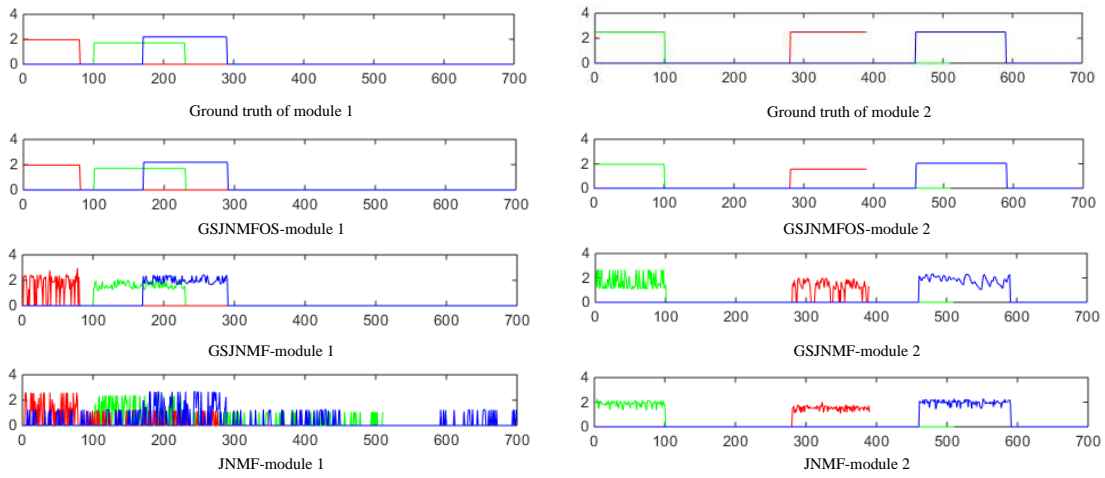

(b) the noise level  $\ell=1$

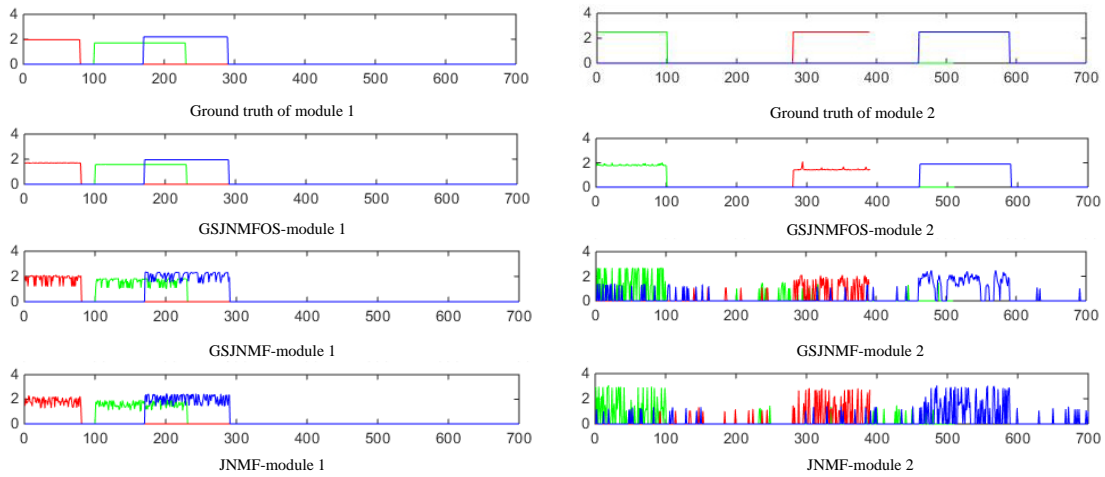

(c) the noise level  $\ell=1.5$

Fig. 3 Z-score of features obtained by GJNMF, GSJNMF and JNMF three algorithms in case4. (a), (b), and (c) are z-score of features obtained by three algorithms at a noise level of 0.5, 1, and 1.5, respectively. Ground truth represents the real z-score of the features.

### Appendix B

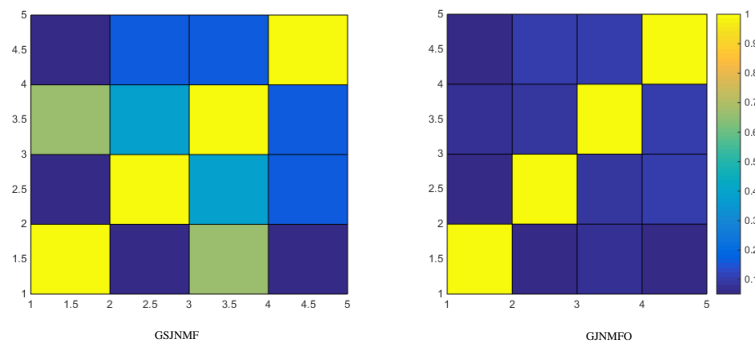

Fig. 1 The correlations between any two columns in the basis matrix of GJNMFO and GSJNMF.

### Appendix C

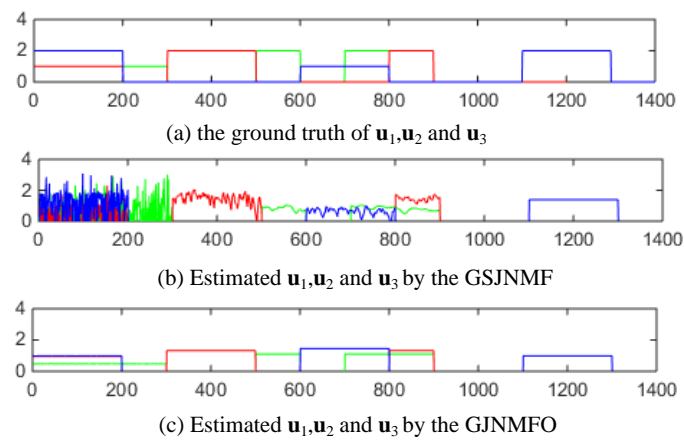

Fig. 1 (a) represents the ground truth of  $\mathbf{u}_1$ ,  $\mathbf{u}_2$  and  $\mathbf{u}_3$ , where green represents  $\mathbf{u}_1$ , red represents  $\mathbf{u}_2$ , and blue represents  $\mathbf{u}_3$ . (b) Estimated  $\mathbf{u}_1$ ,  $\mathbf{u}_2$  and  $\mathbf{u}_3$  by the GSJNMF. (c) Estimated  $\mathbf{u}_1$ ,  $\mathbf{u}_2$  and  $\mathbf{u}_3$  by the GJNMFO.
